# Supplementary material
Source: PubMed Central journal article supplement (PMC2750855)
Supplement: NIHMS126854-supplement-1.pdf [file NIHMS126854-supplement-1.pdf]

**Online Supplement**

**Estrous cycle dependent neurovascular dysfunction induced by angiotensin II in the mouse neocortex**

Carmen Capone<sup>1</sup>, Josef Anrather<sup>1</sup>, Teresa A. Milner<sup>1,2</sup>, and Costantino Iadecola<sup>1</sup>

<sup>1</sup>Division of Neurobiology  
Department of Neurology and Neuroscience  
Weill Cornell Medical College  
1300 York Avenue  
New York, NY 10021, USA

<sup>2</sup>Harold and Margaret Milliken Hatch Laboratory of Neuroendocrinology  
The Rockefeller University  
New York, NY 10065

**Running head:** Estrus cycle and cerebrovascular effects of AngII

**Correspondence:**

Costantino Iadecola, M.D.  
Division of Neurobiology  
Weill Cornell Medical College  
407 East 61<sup>st</sup> Street  
New York, NY 10065  
Phone: 646/962-8279  
Email: [coi2001@med.cornell.edu](mailto:coi2001@med.cornell.edu)

### Supplemental table S1

Arterial blood gases and pH in the mice in which CBF was studied

| Cycle phase              | Treatment | n | pCO <sub>2</sub><br>(mmHg) | pO <sub>2</sub><br>(mmHg) | pH        |
|--------------------------|-----------|---|----------------------------|---------------------------|-----------|
| Proestrus                | saline    | 6 | 36.6±1.2                   | 129.4±3.8                 | 7.37±0.05 |
|                          | AngII     |   | 35.8±1.1                   | 132.2±3.7                 | 7.37±0.04 |
| Estrus                   | saline    | 6 | 35.9±1.7                   | 128.8±4.6                 | 7.35±0.06 |
|                          | AngII     |   | 37.1±1.8                   | 133.1±2.5                 | 7.36±0.06 |
| Diestrus                 | saline    | 6 | 36.9±1.5                   | 131.3±4.2                 | 7.35±0.07 |
|                          | AngII     |   | 36.1±2.1                   | 129.8±2.9                 | 7.37±0.06 |
| Proestrus+<br>ICI182,780 | saline    | 5 | 36.9±1.4                   | 130.1±4.8                 | 7.36±0.05 |
|                          | AngII     |   | 37.3±1.3                   | 130.9±4.3                 | 7.37±0.07 |

## Online figures

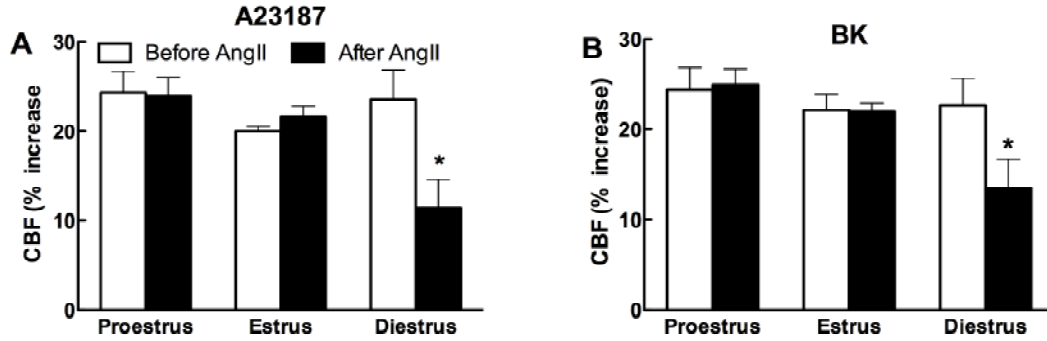

**Figure S1**

**Figure S1:** Cerebrovascular effect of acute i.v. administration of AngII in cycling female mice. Effect of AngII on CBF increase produced by A23187 (A) or BK (B). \* $p < 0.05$  from respective control before AngII; analysis of variance and Tukey's test;  $n = 6$ /group.

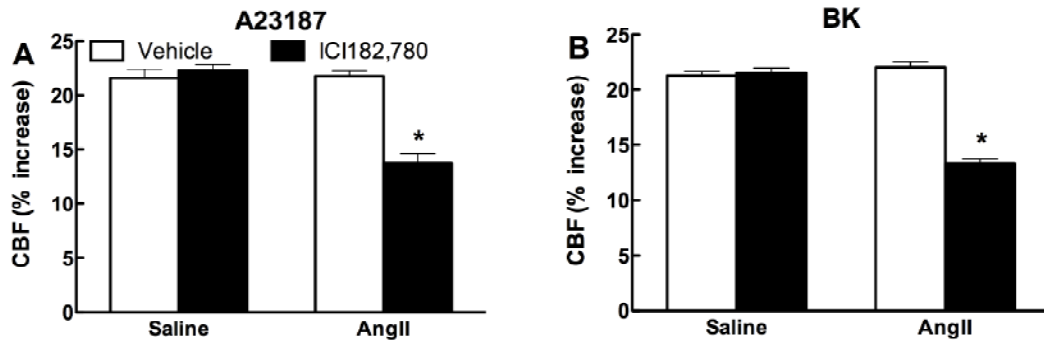

**Figure S2**

**Figure S2:** Cerebrovascular effect of AngII in proestrus mice treated with the estrogen receptor inhibitor ICI182,780 (10 $\mu$ M; neocortical application). Effect of AngII on the CBF increase produced by A23187 (A) or BK (B) \* $p < 0.05$  from vehicle; analysis of variance and Tukey's test;  $n = 5$ /group.
